# Supplementary material for: Probing the pinning strength of magnetic vortex cores with sub-nanometer resolution
Source: PubMed Central journal article supplement (PMC7275073; doi:10.1038/s41467-020-16701-y), 2020-06-05
Supplement: 41467_2020_16701_MOESM1_ESM.pdf [file 41467_2020_16701_MOESM1_ESM.pdf]

1 **Supplementary Information: Probing the Pinning Strength of**  
2 **Magnetic Vortex Cores with sub-nm Resolution**

3 Christian Holl,<sup>1,\*</sup> Marvin Knol,<sup>1</sup> Marco Pratzer,<sup>1</sup> Jonathan Chico,<sup>2</sup>  
4 Imara Lima Fernandes,<sup>2</sup> Samir Lounis,<sup>2</sup> and Markus Morgenstern<sup>1</sup>

5 <sup>1</sup>*II. Institute of Physics B and JARA-FIT,*

6 *RWTH Aachen University, D-52074 Aachen, Germany*

7 <sup>2</sup>*Peter Grünberg Institut and Institute for Advanced Simulation,*  
8 *Forschungszentrum Jülich and JARA, 52425, Jülich, Germany*

9 (Dated: May 11, 2020)

---

\* holl@physik.rwth-aachen.de



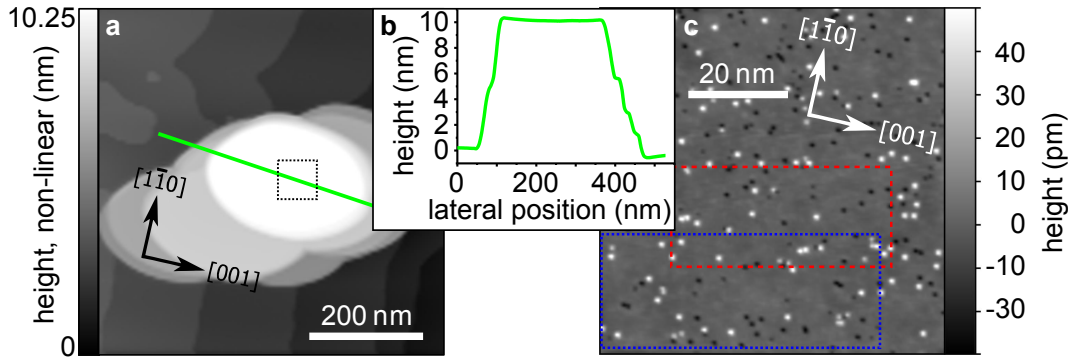

Supplementary Figure 1. **Investigated Fe island.** **a**, Topographic image of the island displayed in non linear gray-scale to enhance the visibility of substrate step edges. The island is imaged multiple times due to tip artifacts. **b**, Topographic profile along the green path in **a**. The average island height is 10 nm. **c**, Zoom into the area marked by the dashed box in **a** showing the adsorbates. Red box depicts the area imaged in Fig. 1e of the main text, blue box depicts the area imaged in Fig. 1f of the main text [1].

24 **Supplementary Note 1: FE ISLAND**

25 Supplementary Figure 1a shows an STM image of the Fe island that has been studied in  
 26 Fig. 1b-f and Fig. 2 of the main text. Its size is  $255 \times 165 \times 10 \text{ nm}^3$ . The crystallographic  
 27 axes of the substrate as deduced from a low-energy electron diffraction pattern are added.  
 28 The topographic image suffers from a multi-tip artifact that images the island several times.  
 29 This does not influence spectroscopic measurements on the topmost imaged surface since  
 30 the additional tips are a few nanometers away from that surface during its measurement.

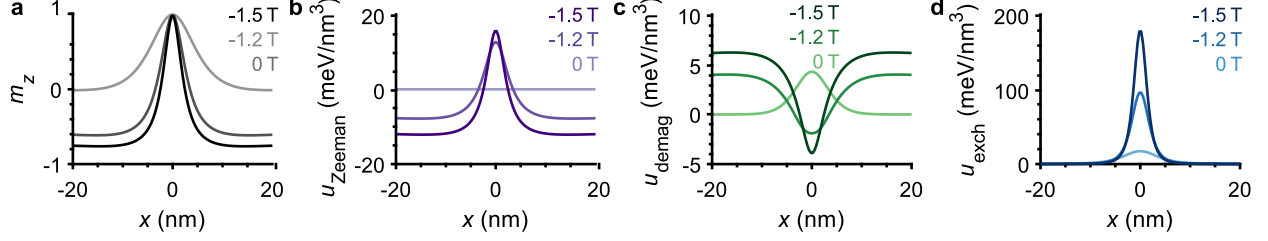

Supplementary Figure 2. **Vortex core energy densities.** **a**, Profiles of perpendicular magnetization  $m_z = M_z/M_{\text{sat}}$  of a simulated vortex core in a disk of height 10 nm and diameter 280 nm at  $B_{\perp}$  according to legend. **b-d**, Profiles of Zeeman energy density, demagnetization energy density, and exchange energy density.

31 **Supplementary Note 2: MICROMAGNETIC ENERGY DENSITIES OF VORTEX**  
 32 **CORE**

33 Magnetic vortex patterns are relaxed within the micromagnetic software package mumax<sup>3</sup>  
 34 for a circular Fe island of thickness 10 nm and diameter 280 nm at perpendicular fields of  
 35  $B_{\perp} = 0$  T, -1.2 T, and -1.5 T. The simulation space is discretized into  $768 \times 768 \times 1$  cells  
 36 of size  $0.364 \times 0.364 \times 10$  nm<sup>3</sup>. Magnetic parameters are set to saturation magnetization  
 37  $M_{\text{sat}} = 17$  kA/m, exchange stiffness  $A_{\text{ex}} = 21$  pJ/m, and zero magnetocrystalline anisotropy  
 38 [2]. Spatially resolved energy densities of the Zeeman term, the demagnetization and the  
 39 exchange are output by the software after relaxation of the magnetization pattern. Profiles  
 40 through the vortex center of the cylindrical symmetric energy densities are shown together  
 41 with profiles of the scaled out-of-plane magnetization  $m_z$  in Supplementary Fig. 2.

42 The  $m_z$  profiles (Supplementary Fig. 2a) largely map the experimentally observed  $dI/dV$   
 43 images, in particular, if the exact shape of the island is taken into account (section Supplementary  
 44 Note 3). The exchange energy densities (Supplementary Fig. 2d) are much larger than the  
 45 other two energy contributions. They, moreover, vary by approximately an order of magni-  
 46 tude with  $B_{\perp}$ , which results in a strong variation of pinning strength with  $B_{\perp}$  for a defect  
 47 with absent  $A_{\text{ex}}$ , as described in the main text.

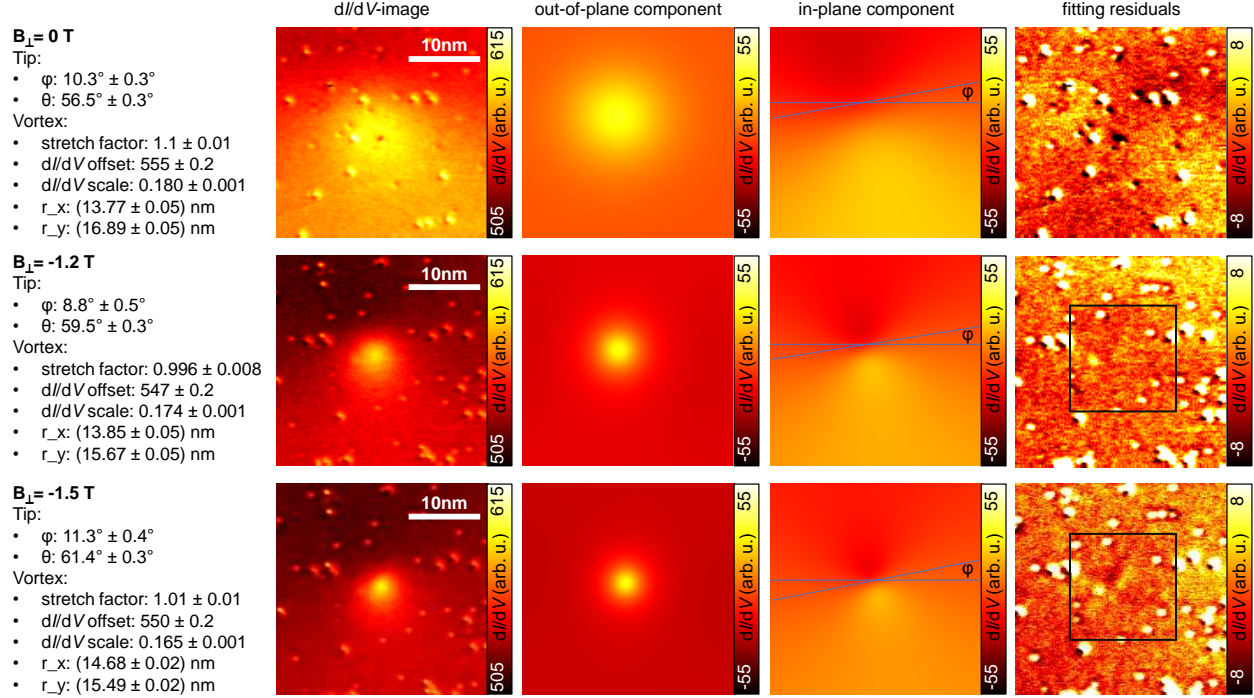

Supplementary Figure 3. **Fitting the  $dI/dV$  image of a vortex core by micromagnetically simulated  $m_z$  profiles.** Each row belongs to one  $B_{\perp}$  as marked. The columns show (left to right): Fit parameters, original  $dI/dV$  images (same as Fig. 1b-d of main text), fitted out-of-plane magnetization component of  $dI/dV$ , fitted in-plane magnetization component of  $dI/dV$ , residual image. Note the larger contrast scale of the residual image by about an order of magnitude with respect to the other images. The fit parameters are azimuthal angle  $\phi$  and polar angle  $\theta$  of tip magnetization, a lateral scaling factor for the micromagnetically simulated images called stretch factor, a  $dI/dV$  offset and  $dI/dV$  scaling factor to account for non-spin-polarized  $dI/dV$  background and magnitude of spin polarized  $dI/dV$  signal, respectively [3], and the desired core center position  $(r_x, r_y)$  [1]. The black squares in the two lower right images mark the area where the fit is optimized. The fit angle  $\phi$  is indicated in the images of the fourth column.

### 48 **Supplementary Note 3: CORE FITTING PROCEDURE**

49 Supplementary Figure 3 visualizes the fitting procedure for  $dI/dV$  images of the vortex  
 50 core as shown in Fig. 1b-d of the main text and again in the 2<sup>nd</sup> column of Supplementary  
 51 Fig. 3.

52 The micromagnetic simulations employed for the core fits are conducted for an Fe island  
 53 with thickness of 10 nm and lateral shape as determined by STM experimentally. The

island is discretized in cells of  $0.359 \times 0.359 \times 1 \text{ nm}^3$ . The experimental  $dI/dV$  images and the micromagnetically simulated magnetization images are firstly interpolated to the same resolution. Moreover, defects are removed from the experimental image by a masking procedure prior to the fitting. Fit parameters are the two angles of the tip magnetization vector, the core position  $(r_x, r_y)$ , a small lateral scale factor for the simulated images as well as the required offset and scale factor to transfer the dot product of magnetization vectors of tip and sample to the simulated  $dI/dV$  value [3].

The seven fit parameters are optimized towards minimum RMS deviation between simulated and measured  $dI/dV$  map employing the MATLAB inbuilt trust-region-reflective least squares algorithm. At larger  $B_\perp$ , we only use the displayed black squares in the right column of Supplementary Fig. 3 for optimization such that we get more sensitive to the core region. The quality of the fits is visible in the most right column of Supplementary Fig. 3 showcasing the residual images that are obtained by subtracting the simulated  $dI/dV$  image from the experimental one. Only the adsorbates on the surface are visible with barely any magnetic contrast originating from the vortex core, even at the tenfold increased contrast scale of the residual images with respect to the experimental  $dI/dV$  images. The resulting fit parameters and confidence intervals are given in the left column of Supplementary Fig. 3.

The fit parameters firstly reveal a tip magnetization that slightly cants into the out-of-plane direction with increasing  $B_\perp$  as expected. Moreover, the stretch scale is very close to one at larger  $B_\perp$ , while deviating by 10% at  $B_\perp = 0 \text{ T}$ . In line, the residual contrast surrounding the core is more pronounced at  $B_\perp = 0 \text{ T}$ , where it features four areas of alternating bright and dark contrast. This is likely caused by the influence of adsorbates on the in-plane magnetization that prohibits a perfect fitting by the micromagnetic vortex simulated without defects. In line, the stretch factor at larger  $B_\perp$  also deviates from one by  $\sim 10\%$ , if the adapting area is not reduced to the displayed square. The deduced  $dI/dV$  offset and  $dI/dV$  scale are very similar for all three  $B_\perp$ . The obtained large consistency of all fit parameters implies that the fits are reliable, in particular, at larger  $B_\perp$ , enabling a rather precise determination of the core center position of the vortex.

Via the extracted angle  $\theta$  of tip magnetization, we, moreover, can discriminate the out-of-plane contrast and the in-plane contrast of the  $dI/dV$  images as displayed in the third and fourth column of Supplementary Fig. 3 for the simulated  $dI/dV$  images. The in-plane angle of tip magnetization  $\phi$  is additionally marked. The discrimination is used to display

86 an overlap of several vortex cores in one image as in Fig. 1e-f of the main text. To improve  
87 the visibility of each core, we subtract the in-plane contrast from the experimental  $dI/dV$   
88 images. For Fig. 1f of the main text and the Supplementary Movie 2, we afterwards multiply  
89 the remaining out-of-plane contrast including defects by a Gaussian envelope centered at  
90 the vortex core center. This makes following the vortex core visually significantly more easy.

91 **Supplementary Note 4: CORE MOVEMENT IN ELLIPTIC ISLAND**

92 As described in the main text, the lateral core position  $\mathbf{r}$  induced by  $\mathbf{B}_{\parallel} = (B_x, B_y)$  follows  
93  $\mathbf{r}(\mathbf{B}_{\parallel}) = (\chi_{\text{free}}B_y, \chi_{\text{free}}B_x)$  with displacement rate  $\chi_{\text{free}}$  for a circular magnetic island [4]. We  
94 assume a similar relation  $\mathbf{r}(\mathbf{B}_{\parallel}) = (\chi_{x,\text{free}}B_y, \chi_{y,\text{free}}B_x)$  for the investigated elliptical island.  
95 This allows us to deduce target positions from  $\mathbf{B}_{\parallel}$  by a shift  $\mathbf{r} = (\chi_{x,\text{free}}B_y, \chi_{y,\text{free}}B_x)$  from the  
96 starting point  $\mathbf{r}(\mathbf{0 T}) = \mathbf{0 nm}$ . The validity of this assumption is verified by micromagnetic  
97 simulations revealing that a change of  $\mathbf{B}_{\parallel}$  by  $\Delta\mathbf{B}_{\parallel}$  results in nearly identical core shifts  $\Delta\mathbf{r}$   
98 independent of  $\mathbf{B}_{\parallel}$ . We employ a  $3 \times 3$  grid of simulations with equidistant  $\mathbf{B}_{\parallel}$  using the  
99 experimental island shape with cell size  $0.36 \times 0.36 \times 10 \text{ nm}^3$  and magnetic parameters as  
100 displayed in Fig. 3a of the main text.

101 Supplementary Figure 4a–c show an  $m_z$  overlay of the resulting nine vortex cores with  
102 centers connected by colored vectors for each of the three experimental  $B_{\perp}$ . The bottom left  
103 vortex core is used as reference point with two lattice vectors (blue) to its nearest neighbors.  
104 These vectors set the displacement rates  $\chi_{x,\text{free}}$  and  $\chi_{y,\text{free}}$ . Assuming constant  $\chi_{i,\text{free}}$ , the red  
105 vectors mark the lattice continuation that roughly hits the other calculated vortex cores.  
106 Zooming into the area of the upper right core (Supplementary Fig. 4d–f) reveals a remaining  
107 mismatch of  $\sim 1 \text{ nm}$ . This corresponds to a displacement error of  $\sim 3\%$  on the full range  
108 of  $37 \text{ nm}$  of core movement, directly translating to an error of the anticipated constant  $\chi_{\text{free}}$   
109 in Fig. 2f–h of the main text. Note that the distance of the simulated core movement in  
110 Supplementary Fig. 4 is identical to the experimental one in Fig. 2f–h of the main text.



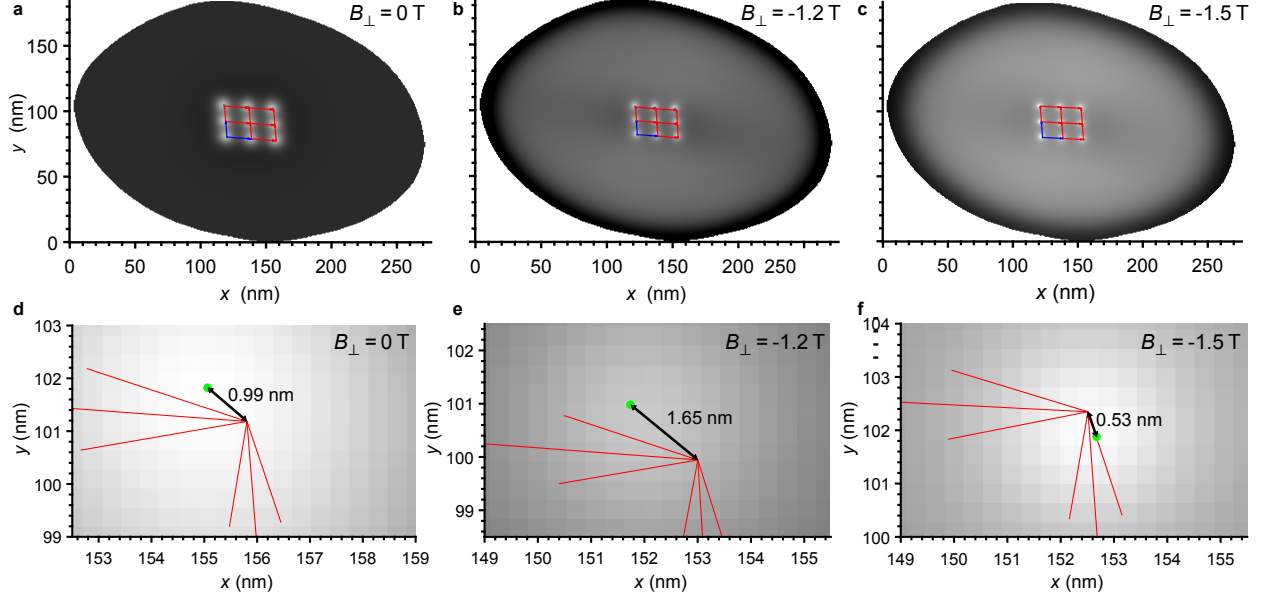

Supplementary Figure 4. **Validity of constant displacement rate by  $B_{\parallel}$  in an elliptical island.** The program `mumax3` is used to simulate the movement of the vortex core within an island featuring the shape of the experimental one. Nine positions are targeted using a  $3 \times 3$  grid of equidistant  $(B_x, B_y)$ . **a-c**, Grayscale plots of cumulative  $m_z$  of all nine simulations featuring all nine vortex cores for each  $B_{\perp}$ . The contrast is adapted to minimum and maximum of  $m_z$  in each image individually. Blue vectors interconnect the lower left vortex core center to its two neighbors. Red vectors result from shifting the blue vectors in order to continue the lattice. **a**,  $B_{\perp} = 0\text{ T}$ ,  $B_x = 12/0/-12\text{ mT}$ ,  $B_y = -12/0/12\text{ mT}$ . **b**,  $B_{\perp} = -1.2\text{ T}$ ,  $B_x = 8/0/-8\text{ mT}$ ,  $B_y = -8/0/8\text{ mT}$ . **c**,  $B_{\perp} = -1.5\text{ T}$ ,  $B_x = 7/0/-7\text{ mT}$ ,  $B_y = -7/0/7\text{ mT}$ . **d-f**, Zoom into the upper right vortex core area of the  $3 \times 3$  grid in a-c, respectively. The green dots mark the simulated vortex core center deduced from the  $m_z$  maximum as found by spline interpolation. Red arrows are the end points of the continuation vectors from a-c. The mismatch between the vector addition (red arrows) and the simulated core positions is marked being 1–4% of the full distance of movement of 37 nm.

111 **Supplementary Note 5: CORE BENDING WITHIN FE ISLAND BY PINNING AT**  
112 **THE SURFACE**

113 Spin polarized STM probes the magnetization of the surface layer that could be distinct  
114 from the magnetization in deeper layers. In particular, if the pinning center is at the surface  
115 only, the vortex core might bend towards its target position in deeper layers. Here, we show  
116 that the resulting vortex core bending is small.

117 We analyze micromagnetic simulations with vortex cores shifted from the island center.  
118 The shift is achieved by fixing  $m_z$  within  $4 \times 4$  surface cells offset from the island center. The  
119 fixed  $m_z$  values are set to the values that are found in the core center for simulations without  
120 defects. The resulting cross section of  $m_z$  through the island (Supplementary Fig. 5a) is  
121 analyzed. We use cross sections slightly offset from the island center to avoid the cells with  
122 artificially fixed  $m_z$ . Supplementary Figure 5b shows deduced core positions ( $m_z$  maxima)  
123 evaluated for each layer separately. The core at  $B_{\perp} = 0$  T (-1.2 T, -1.5 T) is bent by 30 %  
124 (6.3 %, 2.7 %) of the average displacement from the island center. The bending at  $B_{\perp} \neq 0$  T,  
125 where we observe pinning in the experiment, is well below 10% and, hence, barely changes  
126 the pinning energy. Such core bending is anyway included in our micromagnetic simulations  
127 of  $u_{\text{exch}}$  (Fig. 3g of the main text) and in the calculation of the parabolic potential  $E_{\text{flex}}$   
128 for moving the vortex core away from its target (Supplementary Fig. 7a, Supplementary  
129 Fig. 8a).

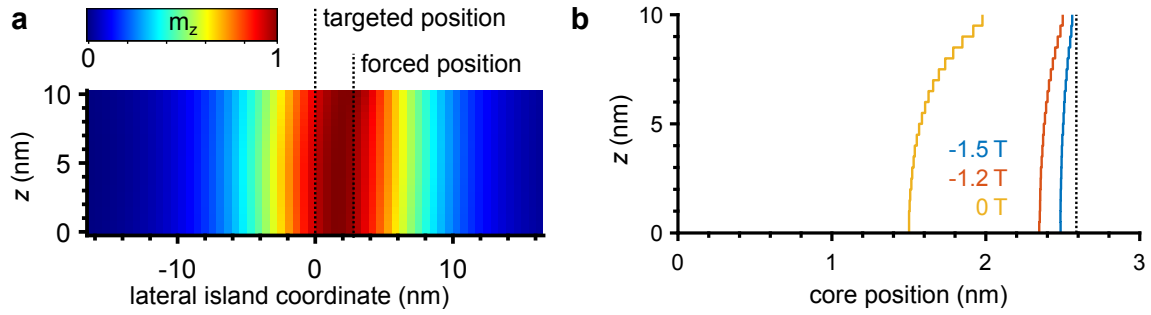

Supplementary Figure 5. **Core bending in Fe island.** **a**, Cross-sectional view of perpendicular magnetization  $m_z$  at  $B_{\perp} = 0$  T recorded for a plane that is 1 nm offset from the vortex core center. The circular island has thickness of 10 nm and diameter of 280 nm. The core is forced away from the island center by fixing  $m_z$  in  $4 \times 4$  surface cells at 2.6 nm. **b**, Core position ( $m_z$  maximum) in each of the 20 layers of the simulated island for  $B_{\perp}$  as labeled. The dotted black line depicts the position of frozen  $m_z$ .

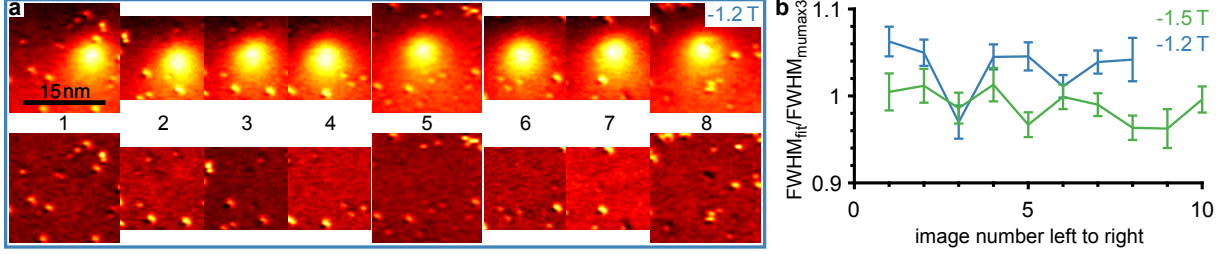

Supplementary Figure 6. **Core diameters for various core positions.** **a**, Top row:  $dI/dV$  images at  $B_{\perp} = -1.2$  T used to determine the 8 core positions marked in Fig. 2b of the main text. The images are fitted as described in section S3, resulting in the residuals as shown in the bottom row. The contrast of each image is scaled differently to optimize visibility. **b**, FWHM of the  $m_z$  distribution deduced via fit of the images of **a** (blue) and of 10 images recorded at  $B_{\perp} = -1.5$  T with core positions as marked in Fig. 2b of the main text (green). The FWHM obtained from the fit is scaled to the FWHM of a simulation without defects (called stretch factor in Supplementary Fig. 3) to ease comparison of the data at different  $B_{\perp}$ . The error bars correspond to 95 % confidence interval.

130 **Supplementary Note 6: CORE POSITION ERROR USING  $dI/dV$  DATA AT FIXED**  
 131 **POSITION AND VARYING  $B_{\parallel}$**

132 In Fig. 2 of the main text, we deduced the vortex core position from measuring  $dI/dV$   
 133 at fixed tip position, while varying  $B_{\parallel}$ . This assumes a rigid vortex motion along a straight  
 134 path. The assumption implies errors, since the vortex core shape could change by interac-  
 135 tions with defects and the core is displaced from the straight path due to defect pinning as  
 136 visible in Fig. 2b of the main text. These errors are discussed in the following.

137 To quantify the change of core shape, we analyze the core images along the core path  
 138 of Fig. 2b of the main text (Supplementary Fig. 5a). The FWHM of  $m_z$  distribution is  
 139 deduced from core fitting as described in section S3. It is displayed in Supplementary Fig.  
 140 5b varying by about  $\pm 5\%$  without any obvious trend within the error bars from the fitting  
 141 procedure. Hence, core shape modifications during pinning are below 5%. This value is  
 142 regarded as error for the link between measured  $dI/dV(B_{\parallel})$  and core displacement (Fig. 2  
 143 of main text).

144 Moreover, the core path is deflected from the straight path by the defects. It exhibits RMS  
 145 deviations perpendicular to the target path up to 1.3 nm (Fig. 2b of main text). This implies

146 two systematic errors. First, the path gets longer by the zigzag motion such that  $\chi_{\text{pinned}}$   
147 is underestimated by assuming a straight path. This error is estimated straightforwardly  
148 by using the measured path of Fig. 2b of the main text. The real path is by 5% (0.3%)  
149 longer than the straight path at  $B_{\perp} = -1.5 \text{ T}$  (-1.2 T). For the estimate, we measure the  
150 largest angle between target path and direct lines between adjacent core positions to be  
151  $\sim 30^{\circ}$  ( $\sim 7^{\circ}$ ) at  $B_{\perp} = -1.5 \text{ T}$  (-1.2 T) (Fig. 2b, main text) and assume a normal distribution  
152 of such angles between adjacent core positions up to the maximum angle.

153 Second, perpendicular motion changes the sensed core magnetization at fixed tip position  
154 since the tip probes another part of the vortex. This error largely disappears for multiple  
155 pinning sites, since it either enhances or decreases  $\chi_{\text{pinned}}$  by corresponding changes of  $dI/dV$   
156 depending on the individual core center position with respect to the tip and the target path.

157 **Supplementary Note 7: APPROXIMATIONS FOR MICROMAGNETIC SIMULA-**  
 158 **TIONS**

159 For simulated sweeps of  $\mathbf{B}_{\parallel}$ , as employed for Fig. 2f-h, Fig. 3e, and Fig. 4b of the main  
 160 text, two approximations are used to reduce computational time. They are validated in the  
 161 following.

162 As first approximation, instead of sweeping  $\mathbf{B}_{\parallel}$ , we shift the defect by  $-\chi_{\text{free}}(B_{\perp}) \cdot \mathbf{B}_{\parallel}$   
 163 through the vortex core. This requires that  $E_{\text{flex}}(\mathbf{r}_{\text{vortex}} - \mathbf{r}_{\text{target}})$ , the displacement energy  
 164 of the vortex around a target position  $\mathbf{r}_{\text{target}} = (x_t, y_t)$ , does not depend on  $\mathbf{r}_{\text{target}}$ .

165 To show this, we simulate  $E_{\text{flex}}$  for  $\mathbf{r}_{\text{target}}$  either located in the center of the island or offset  
 166 from it (main text, methods). We employ a grid with one cell in vertical direction for the  
 167 sake of simplicity such that the core displacement is accomplished by a single cell of fixed  
 168  $m_z = 1$  located away from  $\mathbf{r}_{\text{target}}$ . It turned out that  $E_{\text{flex}}$  remained parabolic at all relevant  
 169 distances of  $\mathbf{r}_{\text{target}}$  up to 30 nm from the center of the island. Supplementary Figure 7a  
 170 displays the micromagnetically calculated  $E_{\text{flex}}(\mathbf{r}_{\text{vortex}} - \mathbf{r}_{\text{target}})$  for different  $\mathbf{r}_{\text{target}}$  along the  
 171 target path in comparison with parabolic fits showcasing the nice agreement. The curvature  
 172 of the parabola changed by 0.01 % (10 %) for distances of 5 nm (30 nm) from the island  
 173 center. We conclude that the displacement of the vortex mostly depends on the relative  
 174 distance to the defect, but only marginally on the absolute position of the core within the  
 175 island. Hence, moving the defect instead of the vortex core is a reasonable approximation  
 176 to deduce  $\chi_{\text{pinned}}$  (Fig. 2f-h and Fig. 3e of the main text). Note that Fig. 2f-h of the main  
 177 text cover only  $\pm 8$  nm such that the curvature error is well below 1%.

178 This agreement also justifies the assumption of a paraboloid for  $E_{\text{flex}}(\mathbf{r}_{\text{vortex}} - \mathbf{r}_{\text{target}})$  for  
 179 the simulation of core movement in the disorder potential as shown in Fig. 4b of the main  
 180 text. Deviations from the paraboloid in the direction perpendicular to the target path are  
 181 even smaller, since the effective magnetization around the vortex is even less changed.

182 The independence of  $E_{\text{flex}}(\mathbf{r}_{\text{vortex}} - \mathbf{r}_{\text{target}})$  from  $\mathbf{r}_{\text{target}}$  is corroborated by a simplified  
 183 analytic model assuming a rigid movement of vortex magnetization by  $\mathbf{B}_{\parallel}$  [5]. This employs  
 184 the magnetic displacement model for a magnetic cylinder discussed in the main text with  
 185 potential energy  $E(\mathbf{r}, \mathbf{B}_{\parallel}) = \frac{1}{2}k(x^2 + y^2) - k\chi_{\text{free}}(B_y x + B_x y)$ . The equation can be rewritten  
 186 as  $E(\mathbf{r}) = \frac{1}{2}k((x - x_t)^2 + (y - y_t)^2) + \frac{1}{2}k(x_t^2 + y_t^2)$  with  $x_t = \chi_{\text{free}} \cdot B_y$  and  $y_t = \chi_{\text{free}} \cdot B_x$ .  
 187 Hence, moving  $\mathbf{r}_{\text{target}}$  on a circular island leads only to an offset in potential energy (second

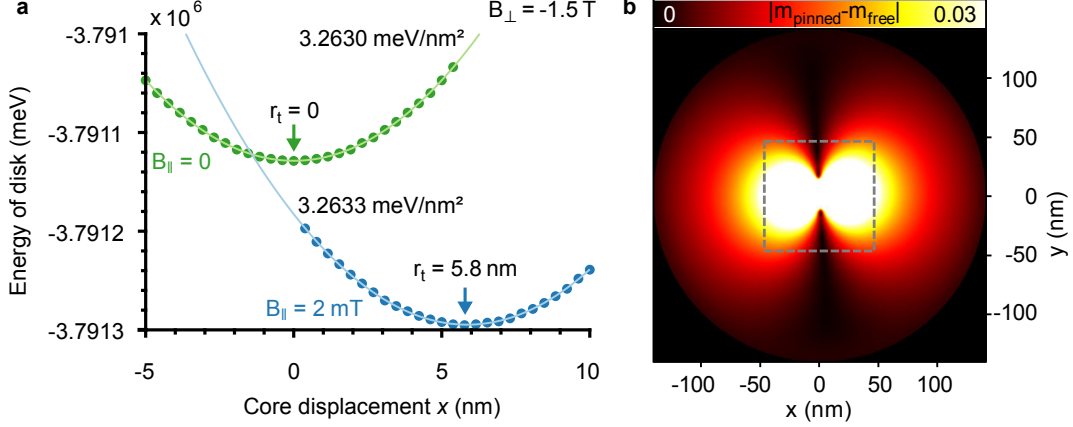

Supplementary Figure 7. **Validation of approximations in micromagnetic simulations.** **a**, Micromagnetically calculated potential energy of vortex core displacement for  $B_{\perp} = -1.5$  T and  $B_y = 0$  T (green dots) as well as  $B_y = 2$  mT (blue dots). The curvatures of the parabolic fits (solid lines) and the equilibrium positions  $r_t$  are marked. The micromagnetic simulations consider a cylindrical island of 280 nm diameter and 10 nm height discretized in cells of  $0.38 \times 0.38 \times 10$  nm<sup>3</sup>. Displacements are realized by fixing one cell to  $m_z = 1$  away from the target position  $\mathbf{r}_{\text{target}}$ . **b**, Absolute difference of  $m_z$  between an unpinned vortex core and a core pinned at  $\mathbf{r}_{\text{vortex}} = (3.6, 0)$  nm away from the island center ( $B_{\perp} = -1.5$  T). Same island size and cell size as in a. Only the area in the dashed box is used for full simulations of vortex-defect-interactions, while the remaining area is approximated by a demagnetization field independent of core position. The normalized magnetization difference within the dashed grey box reaches up to 1.8, while it is below 3 % outside of the box [1].

188 term), but does not affect the potential curvature  $k$  or the potential shape.

189 As second approximation, we crop the simulation area to  $256 \times 256 \times 20$  cells and add the  
 190 demagnetization field of the missing exterior by hand leading to an effective magnetic field  
 191  $\mathbf{B}_{\text{eff}}(\mathbf{r}) = \mathbf{B}_{\perp} + \mathbf{B}_{\text{demag,exterior}}(\mathbf{r})$ .  $\mathbf{B}_{\text{demag,exterior}}(\mathbf{r})$  is calculated once for an unperturbed vortex  
 192 without defects at  $\mathbf{B}_{\parallel} = \mathbf{0}$  T and is fixed afterwards for all other simulations. This is possible,  
 193 since we always use  $\mathbf{B}_{\parallel} = \mathbf{0}$  T and, thus,  $\mathbf{r}_{\text{target}} = \mathbf{0}$  nm via the first approximation. The  
 194 small core displacement resulting from pinning forces by defects changes the magnetization  
 195 only within the cropped area significantly. Supplementary Figure 7b shows the spatially  
 196 resolved absolute difference in magnetization between a vortex core located at  $\mathbf{r}_{\text{vortex}} =$   
 197  $\mathbf{r}_{\text{target}} = \mathbf{0}$  nm and a core moved by pinning to  $\mathbf{r}_{\text{vortex}} = (3.6, 0)$  nm at  $B_{\perp} = -1.5$  T. This

198 displacement is larger than any displacement observed experimentally due to defects. The  
199 scaled magnetization  $m_z$  outside the fully simulated area (gray box) varies by less than 3%  
200 strongly decaying away from the square. As shown in section Supplementary Note 2, the  
201 general influence of demagnetization on the vortex core energy is small. Hence, the resulting  
202 error of using an unmodified  $\mathbf{B}_{\text{demag,exterior}}(\mathbf{r})$  is likely negligible.



203 **Supplementary Note 8: APPROXIMATIONS FOR CORE PATH SIMULATION**

204 To emulate the vortex core path at varying  $\mathbf{B}_{\parallel}$ , we determine its lateral position by po-  
 205 tential energy minimization within a potential landscape given by defects as described in the  
 206 main text. The potential energy firstly consists of the potential  $E_{\text{flex}}(\mathbf{r}_{\text{core}} - \mathbf{r}_{\text{target}})$  describing  
 207 the energy cost to move the core away from its target position  $\mathbf{r}_{\text{target}}(\mathbf{B}_{\parallel})$  in the absence of  
 208 defects. Secondly, the pinning potentials centered at each adsorbate  $E_{i,\text{pin}}(\mathbf{r}_{\text{vortex}} - \mathbf{r}_{i,\text{adsorbate}})$   
 209 contribute to the potential energy. For both potential parts, we use approximations that  
 210 enable easier computation.

211  $E_{\text{flex}}$  is deduced from forcing the vortex core away from  $\mathbf{r}_{\text{target}}$ . Therefore,  $m_z$  is fixed  
 212 within  $4 \times 4 \times 1$  simulation cells at the surface positioned away from  $\mathbf{r}_{\text{target}}$  to the  $m_z$  values  
 213 of a defect-free vortex core center. Subsequently, the vortex energy at the resulting core  
 214 position is calculated. This mimics forcing the core away from  $\mathbf{r}_{\text{target}}$  by a defect. Such  
 215 movement differs from movements via  $\mathbf{B}_{\parallel}$  regarding the change of magnetization in the  
 216 surrounding of the core. The required unphysical area of fixed magnetization barely changes  
 217 the vortex energy. To estimate the corresponding error, we employed a second relaxation  
 218 step while fixing the magnetization obtained from the first relaxation in all cells except of  
 219 the priorly fixed ones and one additional ring of cells surrounding them. For the largest core  
 220 displacement observed at  $B_{\perp} = -1.5 \text{ T}$ , the potential energy changes by only 1.8% due to  
 221 this second relaxation step. Hence, the energy error of fixing  $m_z$  in a few cells is well below  
 222 2%. Afterwards, the resulting  $E_{\text{flex}}(\mathbf{r}_{\text{core}} - \mathbf{r}_{\text{target}})$  is fitted by a parabola (Supplementary  
 223 Fig. 8a). The fit exhibits a negligible RMS deviation of 0.03 meV to the micromagnetic  
 224 data for the largest displacements observed experimentally. Thus, we used a parabola for  
 225  $E_{\text{flex}}(\mathbf{r}_{\text{core}} - \mathbf{r}_{\text{target}})$  further on.

226 For the pinning potentials  $E_{i,\text{pin}}(\mathbf{r}_{\text{vortex}} - \mathbf{r}_{i,\text{adsorbate}})$ , identical for each  $i$ , we superposed a  
 227 repelling Gaussian and the scaled exchange energy density  $u_{\text{exch}}(\mathbf{r})$  of the core as described  
 228 in the main text. To increase computational speed, we employ an analytic representation of  
 229  $u_{\text{exch}}(\mathbf{r})$ , based on an analytic approximation of  $m_z(\mathbf{r})$ :

$$m_z(\mathbf{r}) = a + (1 - a) / \cosh(2 \cdot \text{arcosh}(2) \cdot r / \text{FWHM}) \quad (1)$$

with  $a$  being the magnitude of  $m_z$  in the surrounding of the vortex core and the width of

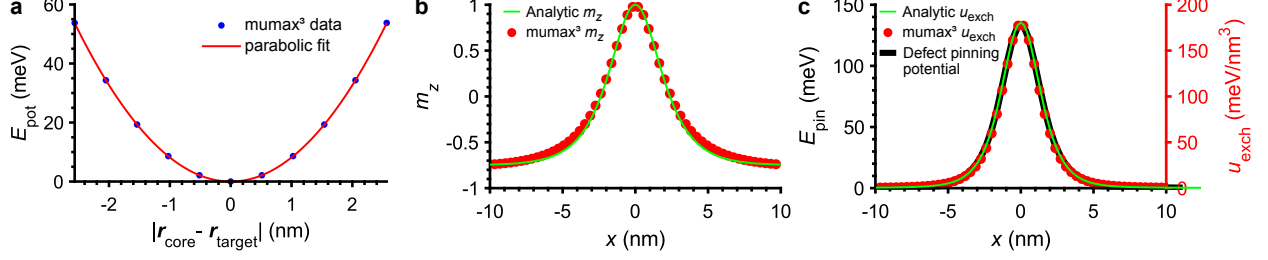

Supplementary Figure 8. **Approximations for core path simulation.** **a**, Potential energy of vortex core without defects as a function of distance between core position  $\mathbf{r}_{\text{core}}$  and target position  $\mathbf{r}_{\text{target}}$ ,  $B_{\perp} = -1.5$  T. The simulation is based on a circular Fe islands (thickness: 10 nm, diameter: 280 nm) discretized into cells of size  $0.364 \times 0.364 \times 0.5$  nm<sup>3</sup>. For each data point, the core is forced away from  $\mathbf{r}_{\text{target}} = (0, 0)$  by fixing  $m_z$  in  $4 \times 4 \times 1$  cells at the surface. The parabolic fit (red line) yields negligible deviations from the data point of 0.03 meV<sub>RMS</sub>. **b**,  $m_z$  profile of vortex core according to micromagnetic simulation by mumax<sup>3</sup> at  $B_{\perp} = -1.5$  T and to the analytic description of eq. (1) with FWHM= 4.2 nm and  $a = -0.8$ . **c**, Vortex core exchange energy density  $u_{\text{exch}}$  from the analytic description (eq. 2) with same parameters as in a and from mumax<sup>3</sup>. The black line depicts the inverted pinning potential for a defect with absent  $A_{\text{ex}}$  (Fig. 3g of main text),  $B_{\perp} = -1.5$  T.

the core FWHM. This leads to

$$\begin{aligned}
 u_{\text{exch}}(\mathbf{r}) &= A_{\text{ex}} \cdot \left( \nabla \mathbf{m}(\mathbf{r}) \right)^2 \\
 &= A_{\text{ex}} \cdot \left( \left( -b \cdot \tanh(r/c) \cdot \text{sech}(r/c)/c \right)^2 \right. \\
 &\quad \left. + \left( 1 - (b \cdot \text{sech}(r/c) + a)^2 \right) / r^2 \right. \\
 &\quad \left. + \left( b \cdot \tanh(r/c) \cdot \text{sech}(r/c) \cdot (b \cdot \text{sech}(r/c) + a) / c / \sqrt{1 - (b \cdot \text{sech}(r/c) + a)^2} \right)^2 \right)
 \end{aligned} \tag{2}$$

230 with  $b = 1 - a$  and  $c = \text{FWHM} / (2 \cdot \text{acosh}(2))$ .

231 Supplementary Figure 8c compares  $u_{\text{exch}}(\mathbf{r})$  from mumax<sup>3</sup> with the analytic description  
 232 as best fit by adapting  $a$  and FWHM. Excellent agreement is achieved with rms deviation  
 233 of 0.6 meV/nm<sup>3</sup> only. The comparison of  $m_z$  profiles is shown in Supplementary Fig. 8b.  
 234 The reversed pinning potential for a defect with suppressed  $A_{\text{ex}}$  within  $1.1 \times 1.1 \times 0.5$  nm<sup>3</sup>  
 235 (Fig. 3g of main text) is added to Supplementary Fig. 8c. Obviously, the relatively small  
 236 defect simply tracks  $u_{\text{exch}}(\mathbf{r})$  such that the scaled analytic  $u_{\text{exch}}(\mathbf{r})$  can be used to mimic the  
 237 attractive part of the defect potential for the core path simulation.

238 **Supplementary Note 9: ERRORS IN CORE PATH SIMULATION AND DEDUCED**  
239 **PINNING POTENTIAL**

240 The most severe error in core path simulation results from the remaining uncertainty in  
241 the adaption of the core shape at a defect. As shown in Supplementary Fig. 6b, the FWHM of  
242 the  $m_z$  profile fluctuates by  $\pm 5\%$ . This translates via eqs. (1) and (2) (section Supplementary  
243 Note 8) to an error of  $\pm 5\%$  in the FWHM of  $u_{\text{exch}}$ , hence, influencing the pinning potential  
244 analogously by construction. The other energy errors are significantly smaller, namely, the  
245 error due to determination of  $E_{\text{flex}}$  via fixing  $m_z$  in  $4 \times 4 \times 1$  simulation cells ( $\leq 1.8\%$ ,  
246 section Supplementary Note 8), the error due to determination of  $E_{\text{flex}}$  by moving the defect  
247 instead of the vortex core ( $< 1\%$ , section Supplementary Note 7), the error due to the  
248 parabolic fit of  $E_{\text{flex}}$  ( $< 0.1\%$ , section Supplementary Note 8) and the error due to the  
249 cropping procedure (likely negligible, section Supplementary Note 7).

250 Another source of error is more difficult to quantify. It is given by uncertainties in the  
251 determined core positions that are non-linearly linked to the deduced defect potential. This  
252 includes the missing knowledge on the true target path due to the fact that start and end  
253 point of the path of the vortex core are influenced by defects, too. The adaption of these  
254 points in our fitting routine reveals deviations by  $1 - 2$  nm on the full length of 40 nm in line  
255 with typical excursion lengths from the straight path due to defects. A similar deviation  
256 results from the anticipated straight target path in an elliptic island being incorrect by  
257  $1 - 2$  nm on the path of 40 nm, too (section Supplementary Note 4). Other position errors  
258 are much smaller such as uncertainties in core center positions deduced from the fitting  
259 of noisy images ( $< 0.1$  nm, section Supplementary Note 3), uncertainties in the overlap of  
260 adjacent images of the vortex core ( $< 0.1$  nm) and creep and drift effects within the images  
261 ( $\sim 0.1$  nm, [6]).

262 Importantly, the main errors can be improved, in principle, via reducing the defect density,  
263 such that the distance between defects is significantly larger than the core diameter. Then,  
264 the influence of a single defect on the core shape can be probed in detail and start and end  
265 points of the target path can be chosen far away from any defect. Subleading errors can be  
266 reduced by more elaborate micromagnetic simulations.

267 **Supplementary Note 10: AB-INITIO CALCULATIONS**

268 We performed ab-initio based calculations of Cr- and O-adatoms deposited on an Fe(110)  
 269 surface using density functional theory (DFT) as implemented in the full-potential Korringa-  
 270 Kohn-Rostoker Green function (KKR-GF) method [7, 8]. Relativistic effects are taken into  
 271 account via the scalar relativistic approach with the self-consistent inclusion of the spin orbit  
 272 coupling as a perturbation. The exchange correlation potential is treated in the local spin  
 273 density approximation as parametrized by Vosko, Wilk and Nusair [9]. Instead of seeking  
 274 for the wave function of the system, the KKR-GF method aims primarily at calculating the  
 275 Green function using multiple scattering theory by solving the Dyson equation:

$$\mathcal{G} = \mathcal{G}_0 + \mathcal{G}_0 \Delta V \mathcal{G}. \quad (3)$$

276 This enables, e.g., to describe impurities deposited on a pristine substrate using an embed-  
 277 ding scheme. Indeed, the previous Dyson equation can be solved in real space by obtaining  
 278 the Green function  $\mathcal{G}$  of the investigated material by knowing the Green function  $\mathcal{G}_0$  of the  
 279 perfect Fe(110) substrate and  $\Delta V$ , the potential change induced by the adatom. Once the  
 280 Green function is obtained, the electronic and magnetic properties are deduced by extracting,  
 281 e.g., charge and spin densities, local density of states, and magnetic exchange interactions.

282 The Fe(110) substrate with a lattice constant of  $a_{\text{lat}} = 286$  pm is simulated considering a  
 283 slab containing 12 layers of Fe with enough vacuum layers surrounding it, six on each side of  
 284 the slab. After relaxing the atomic positions at the surface, leading to values in accordance  
 285 with [10], we solve the previous Dyson equation for a real-space impurity cluster. This  
 286 cluster has a diameter of 6 lattice constants and consists of the adsorbate and 150 Fe atoms  
 287 from the substrate (Supplementary Fig. 9a/c). The adsorbates, O or Cr, are located in the  
 288 long bridge position at a distance of 103 pm above the surface as known for O [10–13] and  
 289 assumed to be identical for Cr.

290 Without the adsorbate, the average magnetic moment of the Fe atoms is  $2.65 \mu_B$ . With  
 291 O (Cr), the closest Fe moment decreases to  $1.68 \mu_B$  ( $0.68 \mu_B$ ) while the substrate without  
 292 considering the adsorbate experiences a cumulative reduction of the magnetization by  $1.7 \mu_B$   
 293 ( $4.6 \mu_B$ ).

294 The change of the anisotropy due to the oxygen adsorbate was calculated by the energy  
 295 difference  $\Delta E_{\alpha-\beta} = (E_{\alpha}^{\text{with O}} - E_{\beta}^{\text{with O}}) - (E_{\alpha}^{\text{without O}} - E_{\beta}^{\text{without O}})$ , where  $\alpha$  and  $\beta$  denote the

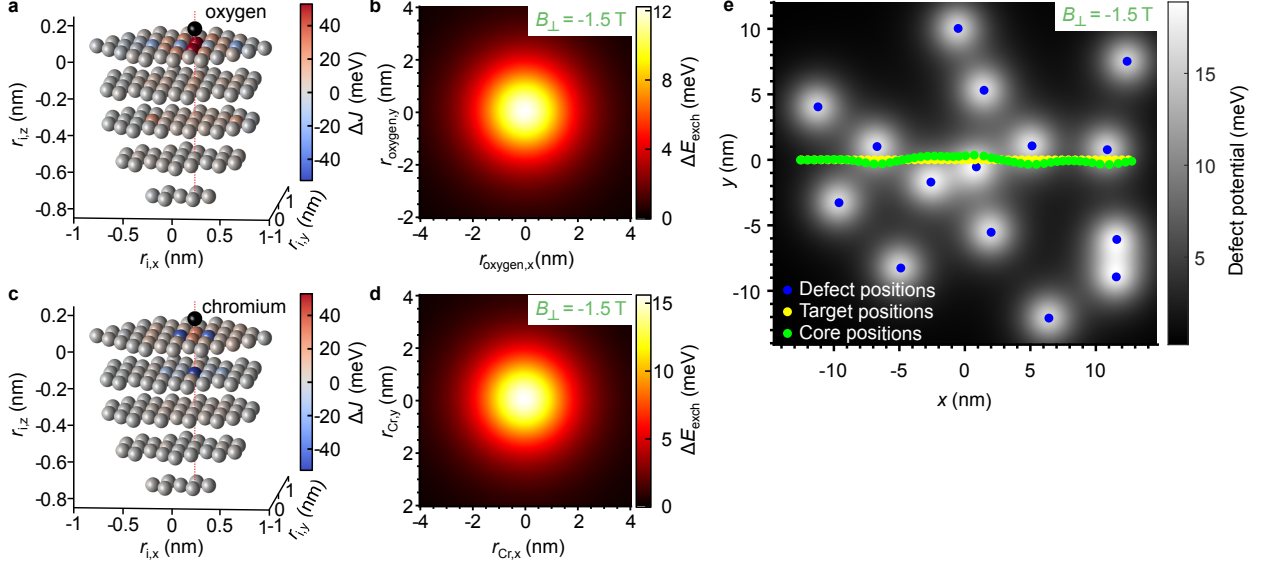

Supplementary Figure 9. **Ab-initio based vortex core energy around O and Cr adsorbates.**

**a**, Change of the site dependent  $J_i = \sum_j J_{ij}/2$  for an Fe-cluster due to adding an O adsorbate (black) at a long bridge position. The difference  $\Delta J_i = J_i^{\text{with O}} - J_i^{\text{without O}}$  is color coded on the grey spheres representing the Fe atoms, i.e., red (blue) color indicates a stronger (weaker) ferromagnetic coupling of the atom at  $r_i$  to the other Fe atoms. **b**, Resulting exchange energy potential of the vortex for varying vortex core position with respect to the O position,  $B_{\perp} = -1.5\text{T}$ . The potential is set to zero far away from the O atom. For each pixel of the potential, the magnetic moments  $\mathbf{m}_i(\mathbf{r}_i)$  of a micromagnetically obtained vortex without defect are used to calculate  $\Delta E_{\text{exch}} = \sum_{i<j} (J_{ij}^{\text{with O}} - J_{ij}^{\text{without O}}) (\mathbf{m}_i \cdot \mathbf{m}_j)$  for the respective vortex core center position with respect to the O position. **c**, Analogous to a, but with Cr adsorbate. **d**, Analogous to b, but with Cr adsorbate. Exchange coupling between Cr and the substrate atoms is taken into account. **e**, Simulated vortex core path (green) at  $B_{\perp} = -1.5\text{T}$  employing 15 Cr defects that are randomly placed within  $10 \times 10\text{ nm}^2$  according to the defect density of the experiment. The resulting disorder potential is displayed as grey scale as deduced from superposing the defect potential of d for each adsorbate. The target path (yellow) consists of 50 equidistant positions along  $y = 0$ .

296 orientation of a ferromagnetic spin configuration along  $[001]$  ( $x$ -axis),  $[1\bar{1}0]$  ( $y$ -axis) or  $[110]$   
 297 ( $z$ -axis). Hence,  $\Delta E_{\alpha-\beta} > 0$  indicates that the easy axis turns towards the  $\beta$ -direction when  
 298 putting the O-adatom on top. The calculated values are  $\Delta E_{x-z} = -0.68\text{ meV}$ ,  $\Delta E_{y-z} =$   
 299  $-0.82\text{ meV}$  and  $\Delta E_{x-y} = 0.13\text{ meV}$ , i.e., an in-plane magnetization along  $y$  is favoured by the

300 O-adatom. Importantly, these energies are much lower than the experimentally observed  
 301 pinning energies ( $\sim 100$  meV) discarding any influence of the anisotropy energy on the  
 302 pinning.

303 Utilizing a mapping procedure based on infinitesimal rotation of the magnetic moments  
 304 [14, 15], the magnetic exchange interactions  $J_{ij}$  of an isotropic Heisenberg Hamiltonian  
 305  $\mathcal{H}_{\text{exc}} = -\sum_{i<j} J_{ij} \mathbf{m}_i \cdot \mathbf{m}_j$ , are extracted from the ab-initio calculations, where  $\mathbf{m}_i$  and  $\mathbf{m}_j$   
 306 are the unit vectors of the magnetic moments of the  $i^{\text{th}}$  and  $j^{\text{th}}$  atom, respectively.

307 A comparison of exchange parameters with and without adsorbate reveals that the cu-  
 308 mulative exchange interaction is enhanced around both types of adatoms. Thus, we observe  
 309 a global exchange stiffening. Supplementary Figure 9a shows a 3D map of the difference  
 310 of the site dependent exchange parameter  $\Delta J_i = J_i^{\text{with O}} - J_i^{\text{without O}}$  where  $J_i = \sum_j J_{ij}/2$ .  
 311 The Fe atoms nearest to the adsorbate along [1-10] ( $y$ -axis) exhibit a stiffening of the ex-  
 312 change interaction, while the exchange interaction along [001] ( $x$ -axis) gets weaker, but by a  
 313 smaller amount. The same is shown in Supplementary Fig. 9c for the Cr adsorbate, where  
 314 stiffening along [1-10] is weaker and weakening along [001] is more pronounced than for the  
 315 O adsorbate. The accumulated change in exchange energy amounts to  $\Delta E_{\text{exch}} = 217$  meV  
 316 (86 meV) for O (Cr) including the contribution of the Cr adatom of  $-34$  meV. Since the  
 317 exchange energy is increased in total (stiffening), a non-collinear magnetic texture as in the  
 318 vortex core gains energy, if located away from the adsorbate, eventually leading to vortex  
 319 core repulsion.

320 To reveal the interaction profile between adsorbates and vortex core, we employ  $J_{ij}$  as  
 321 obtained from DFT and calculate the exchange energy via  $\mathcal{H}_{\text{exc}}$  with the directions of the  
 322 magnetic moments  $\mathbf{m}_i$  set by the micromagnetically simulated vortex core profile. Changing  
 323 the vortex core position with respect to the adsorbate reveals the interaction potentials as  
 324 shown for  $B_{\perp} = -1.5$  T in Supplementary Fig. 9b and d. The shape of the two potentials  
 325 is identical with slightly different amplitude of 12 meV (15.5 meV) for the O (Cr) adatom.  
 326 This amplitude is still an order of magnitude lower than in the experiment (Fig. 4c, main  
 327 text).

328 Nevertheless, assuming the Cr induced interaction potential (Supplementary Fig. 9d),  
 329 we simulated a vortex core path for randomly distributed Cr defects with density as in  
 330 the experiment (Supplementary Fig 9e). The simulation procedure is identical to the one  
 331 employed for Fig. 4b of the main text. The resulting core path (green) at  $B_{\perp} = -1.5$  T

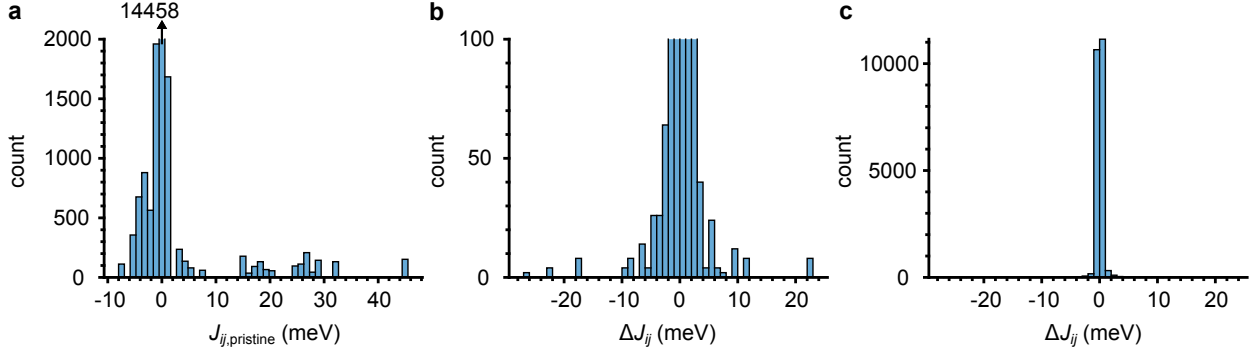

Supplementary Figure 10. **Histograms of exchange interactions between Fe atoms.** **a**, Histogram of all  $J_{ij}$  between the Fe atoms of the pristine substrate up to a distance of 6 lattice parameters around the site where O will be embedded. **b**, Histogram of  $\Delta J_{ij} = J_{ij}^{\text{with O}} - J_{ij}^{\text{without O}}$ , i.e., the changes of  $J_{ij}$  due to the O adsorbate for the same atoms as in **a**. **c**, Same as **b** but displayed at a different scale.

332 deviates by up to 600 pm from the straight target path (yellow). Such a deviation can be  
 333 recorded by spin polarized STM and showcases that single adsorbates can alter the vortex  
 334 path for a core size consisting of  $\sim 10^4$  Fe atoms.

335 However, the much stronger excursions from the target path observed in the experiment  
 336 can not be explained by this simulation. One origin of the discrepancy could be differ-  
 337 ent values of  $J_{ij}$  than calculated via DFT. Supplementary Figure 10 shows histograms of  
 338 the exchange parameter  $J_{ij}$  for the Fe atoms of the pristine substrate (Supplementary Fig.  
 339 10a) as well as of the change of the exchange parameters  $\Delta J_{ij}$  due to adding an O ad-  
 340 sorbate (Supplementary Fig. 10b, c). The changes of  $J_{ij}$  are partly as large as  $J_{ij}$  itself.  
 341 They, moreover, exhibit nearly as much reduction as increase of  $J_{ij}$ . In line, the accumu-  
 342 lated  $\sum \Delta J_{ij} = 217$  meV amounts to only 10% of the accumulated absolute energy change  
 343  $\sum |\Delta J_{ij}| = 2.5$  eV. This showcases that details in the interaction strengths  $J_{ij}$  including sign  
 344 changes can modify the accumulated exchange energy significantly via subtraction of two  
 345 similarly large numbers.

346 Other possible origins of the discrepancy are already mentioned in the main text. Firstly,  
 347 the structural position of the adsorbate might not be correctly described in the DFT calcu-  
 348 lations again changing  $\Delta J_{ij}$  in detail. Secondly, the adsorbate might pinpoint to a particular  
 349 strain field that might originate from the growth procedure and offers preferential adsorption  
 350 sites.

- 
- 352 [1] C. Holl, *High frequency STM and spin polarized STM on magnetic vortices*, Ph.D. thesis,  
353 RWTH Aachen University (2018).
- 354 [2] A. Wachowiak, J. Wiebe, M. Bode, O. Pietzsch, M. Morgenstern, and R. Wiesendanger,  
355 *Science* **298**, 577 (2002).
- 356 [3] M. Bode, *Rep. Prog. Phys.* **66**, 523 (2003).
- 357 [4] R. Badaea and J. Berezovsky, *Phys. Rev. Appl.* **5**, 064003 (2016).
- 358 [5] M. Rahm, J. Stahl, W. Wegscheider, and D. Weiss, *Appl. Phys. Lett.* **85**, 1553 (2004).
- 359 [6] T. Mashoff, M. Pratzner, and M. Morgenstern, *Rev. Sci. Instr.* **80**, 053702 (2009).
- 360 [7] N. Papanikolaou, R. Zeller, and P. H. Dederichs, *J. Phys.: Cond. Mat.* **14**, 2799 (2002).
- 361 [8] D. Bauer, *Development of a relativistic full-potential first-principles multiple scattering Green*  
362 *function method applied to complex magnetic textures of nano structures at surfaces*, Ph.D.  
363 thesis, RWTH Aachen University (2014).
- 364 [9] S. H. Vosko, L. Wilk, and M. Nusair, *Can. J. Phys.* **58**, 1200 (1980).
- 365 [10] T. Ossowski and A. Kiejna, *Surf. Sci.* **637-638**, 35 (2015).
- 366 [11] T. Miyano, Y. Sakisaka, T. Komeda, and M. Onchi, *Surf. Sci.* **169**, 197 (1986).
- 367 [12] M. Getzlaff, J. Bansmann, and G. Schönhense, *J. Magn. Magn. Mater.* **192**, 458 (1999).
- 368 [13] M. Eder, K. Terakura, and J. Hafner, *Phys. Rev. B* **64** (2001), 10.1103/physrevb.64.115426.
- 369 [14] A. I. Liechtenstein, M. I. Katsnelson, and V. A. Gubanov, *J. Phys. F: Met. Phys.* **14**, L125  
370 (1984).
- 371 [15] A. Liechtenstein, M. Katsnelson, V. Antropov, and V. Gubanov, *J. Magn. Magn. Mater.* **67**,  
372 65 (1987).
